# Supplementary material for: Familial analysis reveals rare risk variants for migraine in regulatory regions
Source: PubMed Central journal article supplement (PMC7283211; doi:10.1007/s10048-020-00606-5), 2020-02-19
Supplement: 10048_2020_606_MOESM4_ESM.pdf [file 10048_2020_606_MOESM4_ESM.pdf]

**Supplementary table 3. Information on the rare risk variants identified for the four regulatory regions that were verified in the replication cohort.** The table is divided into sections by regulatory region. Each section contains information on the rare variants within the regulatory region, including the genomic position, reference and alternative allele, available SNP identifiers, and the MAF in the families. Additionally is displayed the variant consequence, transcript biotype, and affected gene as predicted by Ensembl Variant Effect Predictor.

| <b>CpG island on chromosome 6 spanning position 13486092-13488560</b> |                         |                           |                       |                     |                        |                   |                           |                |             |
|-----------------------------------------------------------------------|-------------------------|---------------------------|-----------------------|---------------------|------------------------|-------------------|---------------------------|----------------|-------------|
| <b>Variant position</b>                                               | <b>Reference allele</b> | <b>Alternative allele</b> | <b>SNP identifier</b> | <b>MAF in cases</b> | <b>MAF in controls</b> | <b>Cohort MAF</b> | <b>Consequence</b>        | <b>Biotype</b> | <b>Gene</b> |
| 13486207                                                              | T                       | C                         |                       | 0                   | 1.7e-03                | 4.8e-04           | Intron variant            | Protein coding | GFOD1       |
|                                                                       |                         |                           |                       |                     |                        |                   | Regulatory region variant | Promoter       |             |
| 13486211                                                              | A                       | C                         |                       | 6.7e-04             | 0                      | 4.8e-04           | Intron variant            | Protein coding | GFOD1       |
|                                                                       |                         |                           |                       |                     |                        |                   | Regulatory region variant | Promoter       |             |
| 13486225                                                              | A                       | C                         | rs1156912071          | 6.7e-04             | 0                      | 4.8e-04           | Intron variant            | Protein coding | GFOD1       |
|                                                                       |                         |                           |                       |                     |                        |                   | Regulatory region variant | Promoter       |             |
| 13486232                                                              | T                       | C                         | rs1009132982          | 2.7e-03             | 3.4e-03                | 2.9e-03           | Intron variant            | Protein coding | GFOD1       |
|                                                                       |                         |                           |                       |                     |                        |                   | Regulatory region variant | Promoter       |             |
| 13486235                                                              | T                       | C                         | rs1019642032          | 3.4e-03             | 5.1e-03                | 3.9e-03           | Intron variant            | Protein coding | GFOD1       |

|          |     |     |              |         |         |         |                           |                |       |
|----------|-----|-----|--------------|---------|---------|---------|---------------------------|----------------|-------|
|          |     |     |              |         |         |         | Regulatory region variant | Promoter       |       |
| 13486238 | A   | C   | rs965006702  | 6.7e-04 | 0       | 4.8e-04 | Intron variant            | Protein coding | GFOD1 |
|          |     |     |              |         |         |         | Regulatory region variant | Promoter       |       |
| 13486243 | C   | A   | rs992961184  | 0       | 1.7e-03 | 4.8e-04 | Intron variant            | Protein coding | GFOD1 |
|          |     |     |              |         |         |         | Regulatory region variant | Promoter       |       |
| 13486245 | CAT | C   | rs1491121689 | 2.0e-02 | 2.2e-02 | 2.1e-02 | Intron variant            | Protein coding | GFOD1 |
|          |     |     |              |         |         |         | Regulatory region variant | Promoter       |       |
| 13486246 | AT  | A   | rs1163853849 | 0       | 1.7e-03 | 4.8e-04 | Intron variant            | Protein coding | GFOD1 |
|          |     |     |              |         |         |         | Regulatory region variant | Promoter       |       |
| 13486246 | AT  | ACT |              | 6.7e-04 | 0       | 4.8e-04 | Intron variant            | Protein coding | GFOD1 |
|          |     |     |              |         |         |         | Regulatory region variant | Promoter       |       |
| 13486246 | A   | C   | rs999187989  | 9.4e-03 | 2.2e-02 | 1.3e-02 | Intron variant            | Protein coding | GFOD1 |
|          |     |     |              |         |         |         | Regulatory region variant | Promoter       |       |
| 13486246 | A   | T   | rs999187989  | 0       | 1.7e-03 | 4.8e-04 | Intron variant            | Protein coding | GFOD1 |
|          |     |     |              |         |         |         | Regulatory region variant | Promoter       |       |
| 13486247 | T   | TC  | rs1187872279 | 5.4e-03 | 8.5e-03 | 6.3e-03 | Intron variant            | Protein coding | GFOD1 |

|          |   |                      |              |         |         |         |                           |                |       |
|----------|---|----------------------|--------------|---------|---------|---------|---------------------------|----------------|-------|
|          |   |                      |              |         |         |         | Regulatory region variant | Promoter       |       |
| 13486247 | T | TCCC                 | rs1187872279 | 3.4e-03 | 0       | 2.4e-03 | Intron variant            | Protein coding | GFOD1 |
|          |   |                      |              |         |         |         | Regulatory region variant | Promoter       |       |
| 13486247 | T | TCCCCCCCCC<br>C      |              | 0       | 1.7e-03 | 4.8e-04 | Intron variant            | Protein coding | GFOD1 |
|          |   |                      |              |         |         |         | Regulatory region variant | Promoter       |       |
| 13486247 | T | TCCCCCCCCC<br>CC     |              | 1.3e-03 | 0       | 9.6e-04 | Intron variant            | Protein coding | GFOD1 |
|          |   |                      |              |         |         |         | Regulatory region variant | Promoter       |       |
| 13486247 | T | TCCCCCCCCC<br>CCC    |              | 3.4e-03 | 5.1e-03 | 3.9e-03 | Intron variant            | Protein coding | GFOD1 |
|          |   |                      |              |         |         |         | Regulatory region variant | Promoter       |       |
| 13486247 | T | TCCCCCCCCC<br>CCCC   |              | 6.7e-04 | 0       | 4.8e-04 | Intron variant            | Protein coding | GFOD1 |
|          |   |                      |              |         |         |         | Regulatory region variant | Promoter       |       |
| 13486247 | T | TCCCCCCCCC<br>CCCCC  |              | 6.7e-04 | 0       | 4.8e-04 | Intron variant            | Protein coding | GFOD1 |
|          |   |                      |              |         |         |         | Regulatory region variant | Promoter       |       |
| 13486247 | T | TCCCCCCCCC<br>CCCCCC |              | 1.3e-03 | 1.7e-03 | 1.4e-03 | Intron variant            | Protein coding | GFOD1 |
|          |   |                      |              |         |         |         | Regulatory region variant | Promoter       |       |
| 13486247 | T | TCCCCCCCCC<br>CCCCCC |              | 0       | 1.7e-03 | 4.8e-04 | Intron variant            | Protein coding | GFOD1 |

|          |    |                                      |              |         |         |         |                           |                |       |
|----------|----|--------------------------------------|--------------|---------|---------|---------|---------------------------|----------------|-------|
|          |    |                                      |              |         |         |         | Regulatory region variant | Promoter       |       |
| 13486247 | T  | TCCCCCCCCC<br>CCCCCCCC               |              | 6.7e-04 | 1.7e-03 | 9.6e-04 | Intron variant            | Protein coding | GFOD1 |
|          |    |                                      |              |         |         |         | Regulatory region variant | Promoter       |       |
| 13486247 | T  | TCCCCCCCCC<br>CCCCCCCC               |              | 6.7e-04 | 0       | 4.8e-04 | Intron variant            | Protein coding | GFOD1 |
|          |    |                                      |              |         |         |         | Regulatory region variant | Promoter       |       |
| 13486247 | T  | TCCCCCCCCC<br>CCCCCCCC               |              | 0       | 1.7e-03 | 4.8e-04 | Intron variant            | Protein coding | GFOD1 |
|          |    |                                      |              |         |         |         | Regulatory region variant | Promoter       |       |
| 13486247 | T  | TCCCCCCCCC<br>CCCCCCCC<br>CCCCCCCC   |              | 0       | 1.7e-03 | 4.8e-04 | Intron variant            | Protein coding | GFOD1 |
|          |    |                                      |              |         |         |         | Regulatory region variant | Promoter       |       |
| 13486247 | T  | TCCCCCCCCC<br>CCCCCCCC<br>CCCCCCCCGC |              | 0       | 1.7e-03 | 4.8e-04 | Intron variant            | Protein coding | GFOD1 |
|          |    |                                      |              |         |         |         | Regulatory region variant | Promoter       |       |
| 13486247 | TC | CC                                   | rs1030626971 | 1.3e-02 | 8.5e-03 | 1.2e-02 | Intron variant            | Protein coding | GFOD1 |
|          |    |                                      |              |         |         |         | Regulatory region variant | Promoter       |       |
| 13486247 | TC | T                                    | rs373896526  | 6.7e-04 | 0       | 4.8e-04 | Intron variant            | Protein coding | GFOD1 |
|          |    |                                      |              |         |         |         | Regulatory region variant | Promoter       |       |

|          |     |                                   |              |         |   |         |                           |                |       |
|----------|-----|-----------------------------------|--------------|---------|---|---------|---------------------------|----------------|-------|
| 13486247 | TC  | TCC                               | rs1187872279 | 2.0e-03 | 0 | 1.4e-03 | Intron variant            | Protein coding | GFOD1 |
|          |     |                                   |              |         |   |         | Regulatory region variant | Promoter       |       |
| 13486247 | TC  | TCCCCC                            |              | 6.7e-04 | 0 | 4.8e-04 | Intron variant            | Protein coding | GFOD1 |
|          |     |                                   |              |         |   |         | Regulatory region variant | Promoter       |       |
| 13486247 | TC  | TCCCCCCCCC<br>CCCCC               |              | 1.3e-03 | 0 | 9.6e-04 | Intron variant            | Protein coding | GFOD1 |
|          |     |                                   |              |         |   |         | Regulatory region variant | Promoter       |       |
| 13486247 | TC  | TCCCCCCCCC<br>CCC                 |              | 6.7e-04 | 0 | 4.8e-04 | Intron variant            | Protein coding | GFOD1 |
|          |     |                                   |              |         |   |         | Regulatory region variant | Promoter       |       |
| 13486247 | TC  | TCCCCCCCCC<br>CCCC                |              | 2.7e-03 | 0 | 1.9e-03 | Intron variant            | Protein coding | GFOD1 |
|          |     |                                   |              |         |   |         | Regulatory region variant | Promoter       |       |
| 13486247 | TC  | TCCCCCCCCC<br>CCCC                |              | 6.7e-04 | 0 | 4.8e-04 | Intron variant            | Protein coding | GFOD1 |
|          |     |                                   |              |         |   |         | Regulatory region variant | Promoter       |       |
| 13486247 | TCC | T                                 | rs373896526  | 2.0e-03 | 0 | 1.4e-03 | Intron variant            | Protein coding | GFOD1 |
|          |     |                                   |              |         |   |         | Regulatory region variant | Promoter       |       |
| 13486250 | C   | CCCCCCCCCC<br>CCCCCCCCCC<br>CCCCG |              | 6.7e-04 | 0 | 4.8e-04 | Intron variant            | Protein coding | GFOD1 |
|          |     |                                   |              |         |   |         | Regulatory region variant | Promoter       |       |

|          |    |   |              |         |         |         |                                   |                |           |
|----------|----|---|--------------|---------|---------|---------|-----------------------------------|----------------|-----------|
| 13486255 | C  | T | rs1396460560 | 0       | 1.7e-03 | 4.8e-04 | Intron variant                    | Protein coding | GFOD1     |
|          |    |   |              |         |         |         | Regulatory region variant         | Promoter       |           |
| 13486257 | C  | A | rs28392827   | 3.4e-03 | 6.8e-03 | 4.3e-03 | Intron variant                    | Protein coding | GFOD1     |
|          |    |   |              |         |         |         | Regulatory region variant         | Promoter       |           |
| 13486258 | C  | A | rs57203835   | 1.1e-02 | 1.9e-02 | 1.3e-02 | Intron variant                    | Protein coding | GFOD1     |
|          |    |   |              |         |         |         | Regulatory region variant         | Promoter       |           |
| 13486258 | CA | C | rs375882366  | 2.7e-03 | 8.5e-03 | 4.3e-03 | Intron variant                    | Protein coding | GFOD1     |
|          |    |   |              |         |         |         | Regulatory region variant         | Promoter       |           |
| 13486261 | A  | C | rs1252665552 | 4.7e-03 | 6.8e-03 | 5.3e-03 | Intron variant                    | Protein coding | GFOD1     |
|          |    |   |              |         |         |         | Regulatory region variant         | Promoter       |           |
| 13486263 | A  | C | rs1419858552 | 6.7e-04 | 0       | 4.8e-04 | Intron variant                    | Protein coding | GFOD1     |
|          |    |   |              |         |         |         | Regulatory region variant         | Promoter       |           |
| 13486297 | G  | C | rs2494772    | 2.7e-03 | 0       | 1.9e-03 | Intron variant                    | Protein coding | GFOD1     |
|          |    |   |              |         |         |         | Regulatory region variant         | Promoter       |           |
|          |    |   |              |         |         |         | Noncoding transcript exon variant | Antisense      | GFOD1-AS1 |
| 13486407 | G  | C | rs114976037  | 1.0e-02 | 1.9e-02 | 1.3e-02 | Intron variant                    | Protein coding | GFOD1     |

|          |    |   |              |         |   |         |                                   |                   |           |
|----------|----|---|--------------|---------|---|---------|-----------------------------------|-------------------|-----------|
|          |    |   |              |         |   |         | Regulatory region variant         | Promoter          |           |
|          |    |   |              |         |   |         | Regulatory region variant         | CTCF binding site |           |
|          |    |   |              |         |   |         | Noncoding transcript exon variant | Antisense         | GFOD1-AS1 |
| 13486494 | C  | A | rs1229633433 | 1.3e-03 | 0 | 9.6e-04 | Intron variant                    | Protein coding    | GFOD1     |
|          |    |   |              |         |   |         | Regulatory region variant         | Promoter          |           |
|          |    |   |              |         |   |         | Regulatory region variant         | CTCF binding site |           |
|          |    |   |              |         |   |         | Noncoding transcript exon variant | Antisense         | GFOD1-AS1 |
| 13486567 | AG | A | rs1039121685 | 2.0e-03 | 0 | 1.4e-03 | Intron variant                    | Protein coding    | GFOD1     |
|          |    |   |              |         |   |         | Regulatory region variant         | Promoter          |           |
|          |    |   |              |         |   |         | Regulatory region variant         | CTCF binding site |           |
|          |    |   |              |         |   |         | Noncoding transcript exon variant | Antisense         | GFOD1-AS1 |
| 13486595 | A  | G | rs1241129285 | 6.7e-04 | 0 | 4.8e-04 | Intron variant                    | Protein coding    | GFOD1     |
|          |    |   |              |         |   |         | Regulatory region variant         | Promoter          |           |
|          |    |   |              |         |   |         | Regulatory region variant         | CTCF binding site |           |

|          |   |   |             |         |         |         |                                   |                   |           |
|----------|---|---|-------------|---------|---------|---------|-----------------------------------|-------------------|-----------|
|          |   |   |             |         |         |         | Noncoding transcript exon variant | Antisense         | GFOD1-AS1 |
| 13486605 | T | G | rs533368418 | 1.3e-03 | 1.7e-03 | 1.4e-03 | Intron variant                    | Protein coding    | GFOD1     |
|          |   |   |             |         |         |         | Regulatory region variant         | Promoter          |           |
|          |   |   |             |         |         |         | Regulatory region variant         | CTCF binding site |           |
|          |   |   |             |         |         |         | Noncoding transcript exon variant | Antisense         | GFOD1-AS1 |
| 13486942 | C | T | rs62385806  | 1.0e-02 | 1.9e-02 | 1.3e-02 | 5' UTR variant                    | Protein coding    | GFOD1     |
|          |   |   |             |         |         |         | Regulatory region variant         | Promoter          |           |
|          |   |   |             |         |         |         | Regulatory region variant         | CTCF binding site |           |
| 13487079 | G | A |             | 1.3e-03 | 3.4e-03 | 1.9e-03 | 5' UTR variant                    | Protein coding    | GFOD1     |
|          |   |   |             |         |         |         | Regulatory region variant         | Promoter          |           |
|          |   |   |             |         |         |         | Regulatory region variant         | CTCF binding site |           |
| 13487170 | G | A | rs549568711 | 4.0e-03 | 3.4e-03 | 3.9e-03 | 5' UTR variant                    | Protein coding    | GFOD1     |
|          |   |   |             |         |         |         | Regulatory region variant         | Promoter          |           |
|          |   |   |             |         |         |         | Regulatory region variant         | CTCF binding site |           |
|          |   |   |             |         |         |         | TFBS variant                      |                   |           |
| 13487262 | G | C |             | 6.7e-04 | 1.7e-03 | 9.6e-04 | 5' UTR variant                    | Protein coding    | GFOD1     |



|          |   |   |             |         |         |         |                           |                   |       |
|----------|---|---|-------------|---------|---------|---------|---------------------------|-------------------|-------|
|          |   |   |             |         |         |         | Regulatory region variant | Promoter          |       |
|          |   |   |             |         |         |         | Regulatory region variant | CTCF binding site |       |
| 13487320 | G | T | rs982391    | 1.0e-02 | 1.9e-02 | 1.3e-02 | 5' UTR variant            | Protein coding    | GFOD1 |
|          |   |   |             |         |         |         | Regulatory region variant | Promoter          |       |
|          |   |   |             |         |         |         | Regulatory region variant | CTCF binding site |       |
| 13487362 | A | G | rs114234739 | 4.7e-03 | 3.4e-03 | 4.3e-03 | 5' UTR variant            | Protein coding    | GFOD1 |
|          |   |   |             |         |         |         | Regulatory region variant | Promoter          |       |
|          |   |   |             |         |         |         | Regulatory region variant | CTCF binding site |       |
| 13487399 | T | C | rs2494773   | 2.7e-03 | 0       | 1.9e-03 | 5' UTR variant            | Protein coding    | GFOD1 |
|          |   |   |             |         |         |         | Regulatory region variant | Promoter          |       |
|          |   |   |             |         |         |         | Regulatory region variant | CTCF binding site |       |
| 13487778 | C | T | rs550492110 | 1.1e-02 | 0       | 7.7e-03 | Regulatory region variant | Promoter          |       |
|          |   |   |             |         |         |         | Regulatory region variant | CTCF binding site |       |
|          |   |   |             |         |         |         | Intergenic variant        |                   |       |
| 13487934 | T | C | rs552818164 | 1.3e-03 | 0       | 9.6e-04 | Regulatory region variant | Promoter          |       |

|          |   |   |              |         |         |         |                           |                   |  |
|----------|---|---|--------------|---------|---------|---------|---------------------------|-------------------|--|
|          |   |   |              |         |         |         | Regulatory region variant | CTCF binding site |  |
|          |   |   |              |         |         |         | Intergenic variant        |                   |  |
| 13488369 | A | C | rs1040627839 | 2.0e-03 | 3.4e-03 | 2.4e-03 | Regulatory region variant | Promoter          |  |
|          |   |   |              |         |         |         | Regulatory region variant | CTCF binding site |  |
|          |   |   |              |         |         |         | Intergenic variant        |                   |  |
| 13488372 | T | C | rs903407134  | 6.7e-04 | 3.4e-03 | 1.4e-03 | Regulatory region variant | Promoter          |  |
|          |   |   |              |         |         |         | Regulatory region variant | CTCF binding site |  |
|          |   |   |              |         |         |         | Intergenic variant        |                   |  |
| 13488378 | G | C | rs999070925  | 1.3e-03 | 1.0e-02 | 3.9e-03 | Regulatory region variant | Promoter          |  |
|          |   |   |              |         |         |         | Regulatory region variant | CTCF binding site |  |
|          |   |   |              |         |         |         | Intergenic variant        |                   |  |
| 13488383 | T | C | rs1396741578 | 2.0e-03 | 1.0e-02 | 4.3e-03 | Regulatory region variant | Promoter          |  |
|          |   |   |              |         |         |         | Regulatory region variant | CTCF binding site |  |
|          |   |   |              |         |         |         | Intergenic variant        |                   |  |
| 13488390 | A | C | rs888205423  | 1.3e-03 | 0       | 9.6e-04 | Regulatory region variant | Promoter          |  |

|          |   |   |              |         |         |         |                           |                   |  |
|----------|---|---|--------------|---------|---------|---------|---------------------------|-------------------|--|
|          |   |   |              |         |         |         | Regulatory region variant | CTCF binding site |  |
|          |   |   |              |         |         |         | Intergenic variant        |                   |  |
| 13488433 | G | A | rs933681258  | 1.3e-03 | 0       | 9.6e-04 | Regulatory region variant | Promoter          |  |
|          |   |   |              |         |         |         | Regulatory region variant | CTCF binding site |  |
|          |   |   |              |         |         |         | Intergenic variant        |                   |  |
| 13488444 | T | G | rs1261685243 | 6.7e-04 | 0       | 4.8e-04 | Regulatory region variant | Promoter          |  |
|          |   |   |              |         |         |         | Regulatory region variant | CTCF binding site |  |
|          |   |   |              |         |         |         | Intergenic variant        |                   |  |
| 13488449 | G | C | rs1050765996 | 6.7e-04 | 0       | 4.8e-04 | Regulatory region variant | Promoter          |  |
|          |   |   |              |         |         |         | Regulatory region variant | CTCF binding site |  |
|          |   |   |              |         |         |         | Intergenic variant        |                   |  |
| 13488481 | G | C |              | 6.7e-04 | 0       | 4.8e-04 | Regulatory region variant | Promoter          |  |
|          |   |   |              |         |         |         | Regulatory region variant | CTCF binding site |  |
|          |   |   |              |         |         |         | Intergenic variant        |                   |  |
| 13488490 | C | A | rs542425479  | 6.0e-03 | 3.4e-03 | 5.3e-03 | Regulatory region variant | Promoter          |  |

|                                                                |                         |                           |                       |                     |                        |                   | Regulatory region variant         | CTCF binding site |             |
|----------------------------------------------------------------|-------------------------|---------------------------|-----------------------|---------------------|------------------------|-------------------|-----------------------------------|-------------------|-------------|
|                                                                |                         |                           |                       |                     |                        |                   | Intergenic variant                |                   |             |
| <b>PRE on chromosome 6 spanning position 39310446-39312846</b> |                         |                           |                       |                     |                        |                   |                                   |                   |             |
| <b>Variant position</b>                                        | <b>Reference allele</b> | <b>Alternative allele</b> | <b>SNP identifier</b> | <b>MAF in cases</b> | <b>MAF in controls</b> | <b>Cohort MAF</b> | <b>Consequence</b>                | <b>Biotype</b>    | <b>Gene</b> |
| 39310523                                                       | C                       | A                         | rs12196391            | 5.4e-03             | 1.0e-02                | 6.7e-03           | Intron variant                    | Protein coding    | KCNK17      |
|                                                                |                         |                           |                       |                     |                        |                   | Noncoding transcript exon variant | Retained intron   | KCNK17      |
|                                                                |                         |                           |                       |                     |                        |                   | Regulatory region variant         | CTCF binding site |             |
| 39310607                                                       | G                       | A                         | rs571544467           | 6.7e-04             | 0                      | 4.8e-04           | Intron variant                    | Protein coding    | KCNK17      |
|                                                                |                         |                           |                       |                     |                        |                   | Noncoding transcript exon variant | Retained intron   | KCNK17      |
|                                                                |                         |                           |                       |                     |                        |                   | Regulatory region variant         | CTCF binding site |             |
| 39310675                                                       | T                       | C                         |                       | 6.7e-04             | 0                      | 4.8e-04           | Intron variant                    | Protein coding    | KCNK17      |
|                                                                |                         |                           |                       |                     |                        |                   | Noncoding transcript exon variant | Retained intron   | KCNK17      |
|                                                                |                         |                           |                       |                     |                        |                   | Regulatory region variant         | CTCF binding site |             |
| 39310729                                                       | T                       | C                         | rs116276161           | 7.4e-03             | 3.4e-03                | 6.3e-03           | Intron variant                    | Protein coding    | KCNK17      |
|                                                                |                         |                           |                       |                     |                        |                   | Noncoding transcript exon variant | Retained intron   | KCNK17      |

|          |      |     |                                             |         |         |         |                                   |                   |        |
|----------|------|-----|---------------------------------------------|---------|---------|---------|-----------------------------------|-------------------|--------|
|          |      |     |                                             |         |         |         | Regulatory region variant         | CTCF binding site |        |
| 39310918 | AAAG | A   | rs540653476,<br>COSM5357017,<br>COSM5357018 | 1.1e-02 | 1.5e-02 | 1.2e-02 | Noncoding transcript exon variant | Retained intron   | KCNK17 |
|          |      |     |                                             |         |         |         | Inframe deletion                  | Protein coding    | KCNK17 |
|          |      |     |                                             |         |         |         | Regulatory region variant         | CTCF binding site |        |
| 39310980 | C    | T   | rs143146161,<br>COSM1329694,<br>COSM1329695 | 1.3e-03 | 1.7e-03 | 1.4e-03 | Noncoding transcript exon variant | Retained intron   | KCNK17 |
|          |      |     |                                             |         |         |         | Missense variant                  | Protein coding    | KCNK17 |
|          |      |     |                                             |         |         |         | Regulatory region variant         | CTCF binding site |        |
| 39311018 | G    | C   | rs72855550                                  | 6.7e-04 | 0       | 4.8e-04 | Intron variant                    | Protein coding    | KCNK17 |
|          |      |     |                                             |         |         |         | Noncoding transcript exon variant | Retained intron   | KCNK17 |
|          |      |     |                                             |         |         |         | Regulatory region variant         | CTCF binding site |        |
| 39311050 | T    | C   | rs9471060                                   | 6.7e-04 | 1.7e-03 | 9.6e-04 | Intron variant                    | Protein coding    | KCNK17 |
|          |      |     |                                             |         |         |         | Noncoding transcript exon variant | Retained intron   | KCNK17 |
|          |      |     |                                             |         |         |         | Regulatory region variant         | CTCF binding site |        |
| 39311072 | G    | GCA | rs1373643967                                | 1.1e-02 | 1.0e-02 | 1.1e-02 | Intron variant                    | Protein coding    | KCNK17 |
|          |      |     |                                             |         |         |         | Noncoding transcript exon variant | Retained intron   | KCNK17 |

|          |       |           |              |         |         |         |                                   |                   |        |
|----------|-------|-----------|--------------|---------|---------|---------|-----------------------------------|-------------------|--------|
|          |       |           |              |         |         |         | Regulatory region variant         | CTCF binding site |        |
| 39311072 | G     | GCACA     | rs1373643967 | 1.9e-02 | 1.7e-02 | 1.8e-02 | Intron variant                    | Protein coding    | KCNK17 |
|          |       |           |              |         |         |         | Noncoding transcript exon variant | Retained intron   | KCNK17 |
|          |       |           |              |         |         |         | Regulatory region variant         | CTCF binding site |        |
| 39311072 | G     | GCACACA   | rs1373643967 | 7.4e-03 | 5.1e-03 | 6.7e-03 | Intron variant                    | Protein coding    | KCNK17 |
|          |       |           |              |         |         |         | Noncoding transcript exon variant | Retained intron   | KCNK17 |
|          |       |           |              |         |         |         | Regulatory region variant         | CTCF binding site |        |
| 39311072 | G     | GCACACACA | rs1373643967 | 4.7e-03 | 8.5e-03 | 5.8e-03 | Intron variant                    | Protein coding    | KCNK17 |
|          |       |           |              |         |         |         | Noncoding transcript exon variant | Retained intron   | KCNK17 |
|          |       |           |              |         |         |         | Regulatory region variant         | CTCF binding site |        |
| 39311072 | GCA   | G         | rs764455277  | 3.1e-02 | 2.9e-02 | 3.1e-02 | Intron variant                    | Protein coding    | KCNK17 |
|          |       |           |              |         |         |         | Noncoding transcript exon variant | Retained intron   | KCNK17 |
|          |       |           |              |         |         |         | Regulatory region variant         | CTCF binding site |        |
| 39311072 | GCACA | G         | rs1384140897 | 2.8e-02 | 3.1e-02 | 2.9e-02 | Intron variant                    | Protein coding    | KCNK17 |
|          |       |           |              |         |         |         | Noncoding transcript exon variant | Retained intron   | KCNK17 |

|          |                         |   |              |         |         |         |                                   |                   |        |
|----------|-------------------------|---|--------------|---------|---------|---------|-----------------------------------|-------------------|--------|
|          |                         |   |              |         |         |         | Regulatory region variant         | CTCF binding site |        |
| 39311072 | GCACACA                 | G | rs200555541  | 1.3e-03 | 0       | 9.6e-04 | Intron variant                    | Protein coding    | KCNK17 |
|          |                         |   |              |         |         |         | Noncoding transcript exon variant | Retained intron   | KCNK17 |
|          |                         |   |              |         |         |         | Regulatory region variant         | CTCF binding site |        |
| 39311072 | GCACACACA               | G | rs749145766  | 6.7e-04 | 0       | 4.8e-04 | Intron variant                    | Protein coding    | KCNK17 |
|          |                         |   |              |         |         |         | Noncoding transcript exon variant | Retained intron   | KCNK17 |
|          |                         |   |              |         |         |         | Regulatory region variant         | CTCF binding site |        |
| 39311072 | GCACACACACA             | G | rs1425337022 | 3.4e-03 | 3.4e-03 | 3.4e-03 | Intron variant                    | Protein coding    | KCNK17 |
|          |                         |   |              |         |         |         | Noncoding transcript exon variant | Retained intron   | KCNK17 |
|          |                         |   |              |         |         |         | Regulatory region variant         | CTCF binding site |        |
| 39311072 | GCACACACACACACA<br>CA   | G | rs1448778094 | 1.1e-02 | 2.0e-02 | 1.4e-03 | Intron variant                    | Protein coding    | KCNK17 |
|          |                         |   |              |         |         |         | Noncoding transcript exon variant | Retained intron   | KCNK17 |
|          |                         |   |              |         |         |         | Regulatory region variant         | CTCF binding site |        |
| 39311072 | GCACACACACACACA<br>CACA | G | rs72125468   | 6.7e-04 | 0       | 4.8e-04 | Intron variant                    | Protein coding    | KCNK17 |
|          |                         |   |              |         |         |         | Noncoding transcript exon variant | Retained intron   | KCNK17 |

|          |                                 |                 |              |         |         |         |                                   |                   |        |
|----------|---------------------------------|-----------------|--------------|---------|---------|---------|-----------------------------------|-------------------|--------|
|          |                                 |                 |              |         |         |         | Regulatory region variant         | CTCF binding site |        |
| 39311072 | GCACACACACACACA<br>CACACA       | G               | rs1194978005 | 2.0e-03 | 3.4e-03 | 2.4e-03 | Intron variant                    | Protein coding    | KCNK17 |
|          |                                 |                 |              |         |         |         | Noncoding transcript exon variant | Retained intron   | KCNK17 |
|          |                                 |                 |              |         |         |         | Regulatory region variant         | CTCF binding site |        |
| 39311072 | GCACACACACACACA<br>CACACACACACA | G               | rs779801560  | 1.1e-02 | 3.4e-03 | 8.7e-03 | Intron variant                    | Protein coding    | KCNK17 |
|          |                                 |                 |              |         |         |         | Noncoding transcript exon variant | Retained intron   | KCNK17 |
|          |                                 |                 |              |         |         |         | Regulatory region variant         | CTCF binding site |        |
| 39311072 | GCACACACACACACA<br>CACACACACACA | GCACACA         | rs1194978005 | 6.7e-04 | 0       | 4.8e-04 | Intron variant                    | Protein coding    | KCNK17 |
|          |                                 |                 |              |         |         |         | Noncoding transcript exon variant | Retained intron   | KCNK17 |
|          |                                 |                 |              |         |         |         | Regulatory region variant         | CTCF binding site |        |
| 39311072 | GCACACACACACACA<br>CACACACACACA | GCACACACA       | rs72125468   | 2.7e-02 | 3.4e-03 | 2.0e-02 | Intron variant                    | Protein coding    | KCNK17 |
|          |                                 |                 |              |         |         |         | Noncoding transcript exon variant | Retained intron   | KCNK17 |
|          |                                 |                 |              |         |         |         | Regulatory region variant         | CTCF binding site |        |
| 39311072 | GCACACACACACACA<br>CACACACACACA | GCACACACAC<br>A | rs1448778094 | 1.1e-02 | 1.7e-03 | 8.7e-03 | Intron variant                    | Protein coding    | KCNK17 |
|          |                                 |                 |              |         |         |         | Noncoding transcript exon variant | Retained intron   | KCNK17 |



|          |                                 |                                   |              |         |         |         |                                   |                   |        |
|----------|---------------------------------|-----------------------------------|--------------|---------|---------|---------|-----------------------------------|-------------------|--------|
|          |                                 |                                   |              |         |         |         | Regulatory region variant         | CTCF binding site |        |
| 39311072 | GCACACACACACACA<br>CACACACACACA | GCACACACAC<br>ACACACA             | rs1425337022 | 1.3e-03 | 1.7e-03 | 1.4e-03 | Intron variant                    | Protein coding    | KCNK17 |
|          |                                 |                                   |              |         |         |         | Noncoding transcript exon variant | Retained intron   | KCNK17 |
|          |                                 |                                   |              |         |         |         | Regulatory region variant         | CTCF binding site |        |
| 39311072 | GCACACACACACACA<br>CACACACACACA | GCACACACAC<br>ACACACACA           | rs749145766  | 1.9e-02 | 1.0e-02 | 1.7e-02 | Intron variant                    | Protein coding    | KCNK17 |
|          |                                 |                                   |              |         |         |         | Noncoding transcript exon variant | Retained intron   | KCNK17 |
|          |                                 |                                   |              |         |         |         | Regulatory region variant         | CTCF binding site |        |
| 39311072 | GCACACACACACACA<br>CACACACACACA | GCACACACAC<br>ACACACAC<br>ACA     | rs1384140897 | 1.5e-02 | 3.4e-03 | 1.2e-02 | Intron variant                    | Protein coding    | KCNK17 |
|          |                                 |                                   |              |         |         |         | Noncoding transcript exon variant | Retained intron   | KCNK17 |
|          |                                 |                                   |              |         |         |         | Regulatory region variant         | CTCF binding site |        |
| 39311072 | GCACACACACACACA<br>CACACACACACA | GCACACACAC<br>ACACACAC<br>ACACA   | rs764455277  | 5.4e-03 | 8.5e-03 | 6.3e-03 | Intron variant                    | Protein coding    | KCNK17 |
|          |                                 |                                   |              |         |         |         | Noncoding transcript exon variant | Retained intron   | KCNK17 |
|          |                                 |                                   |              |         |         |         | Regulatory region variant         | CTCF binding site |        |
| 39311072 | GCACACACACACACA<br>CACACACACACA | GCACACACAC<br>ACACACAC<br>ACACACA | rs1373643967 | 1.3e-03 | 0       | 9.6e-04 | Intron variant                    | Protein coding    | KCNK17 |

|          |                                 |                                                 |              |         |         |         |                                   |                   |        |
|----------|---------------------------------|-------------------------------------------------|--------------|---------|---------|---------|-----------------------------------|-------------------|--------|
|          |                                 |                                                 |              |         |         |         | Noncoding transcript exon variant | Retained intron   | KCNK17 |
|          |                                 |                                                 |              |         |         |         | Regulatory region variant         | CTCF binding site |        |
| 39311072 | GCACACACACACACA<br>CACACACACACA | GCACACACAC<br>ACACACACAC<br>ACACACACAC<br>A     | rs1373643967 | 4.7e-03 | 1.7e-03 | 3.9e-03 | Intron variant                    | Protein coding    | KCNK17 |
|          |                                 |                                                 |              |         |         |         | Noncoding transcript exon variant | Retained intron   | KCNK17 |
|          |                                 |                                                 |              |         |         |         | Regulatory region variant         | CTCF binding site |        |
| 39311072 | GCACACACACACACA<br>CACACACACACA | GCACACACAC<br>ACACACACAC<br>ACACACACAC<br>ACA   | rs1373643967 | 0       | 3.4e-03 | 9.6e-04 | Intron variant                    | Protein coding    | KCNK17 |
|          |                                 |                                                 |              |         |         |         | Noncoding transcript exon variant | Retained intron   | KCNK17 |
|          |                                 |                                                 |              |         |         |         | Regulatory region variant         | CTCF binding site |        |
| 39311072 | GCACACACACACACA<br>CACACACACACA | GCACACACAC<br>ACACACACAC<br>ACACACACAC<br>ACACA | rs1373643967 | 6.7e-04 | 0       | 4.8e-04 | Intron variant                    | Protein coding    | KCNK17 |
|          |                                 |                                                 |              |         |         |         | Noncoding transcript exon variant | Retained intron   | KCNK17 |
|          |                                 |                                                 |              |         |         |         | Regulatory region variant         | CTCF binding site |        |
| 39311109 | C                               | T                                               | rs2395723    | 2.0e-03 | 0       | 1.4e-03 | Intron variant                    | Protein coding    | KCNK17 |
|          |                                 |                                                 |              |         |         |         | Noncoding transcript exon variant | Retained intron   | KCNK17 |

|          |   |   |             |         |         |         | Regulatory region variant         | CTCF binding site |        |
|----------|---|---|-------------|---------|---------|---------|-----------------------------------|-------------------|--------|
| 39311223 | T | C | rs1544049   | 2.7e-03 | 0       | 1.9e-03 | Intron variant                    | Protein coding    | KCNK17 |
|          |   |   |             |         |         |         | Noncoding transcript exon variant | Retained intron   | KCNK17 |
| 39311254 | A | C |             | 6.7e-04 | 0       | 4.8e-04 | Intron variant                    | Protein coding    | KCNK17 |
|          |   |   |             |         |         |         | Noncoding transcript exon variant | Retained intron   | KCNK17 |
| 39311273 | G | A | rs375681129 | 8.0e-03 | 1.7e-03 | 6.3e-03 | Intron variant                    | Protein coding    | KCNK17 |
|          |   |   |             |         |         |         | Noncoding transcript exon variant | Retained intron   | KCNK17 |
| 39311355 | G | A | rs1544050   | 2.7e-03 | 0       | 1.9e-03 | Intron variant                    | Protein coding    | KCNK17 |
|          |   |   |             |         |         |         | Noncoding transcript exon variant | Retained intron   | KCNK17 |
| 39311360 | G | A | rs151078165 | 6.7e-03 | 3.4e-03 | 5.8e-03 | Intron variant                    | Protein coding    | KCNK17 |
|          |   |   |             |         |         |         | Noncoding transcript exon variant | Retained intron   | KCNK17 |
| 39311639 | T | C | rs6907212   | 6.7e-04 | 1.7e-03 | 9.6e-04 | Intron variant                    | Protein coding    | KCNK17 |
|          |   |   |             |         |         |         | Noncoding transcript exon variant | Retained intron   | KCNK17 |
| 39311654 | T | A | rs6907218   | 6.7e-04 | 1.7e-03 | 9.6e-04 | Intron variant                    | Protein coding    | KCNK17 |
|          |   |   |             |         |         |         | Noncoding transcript exon variant | Retained intron   | KCNK17 |
| 39311676 | T | G | rs6907225   | 6.7e-04 | 1.7e-03 | 9.6e-04 | Intron variant                    | Protein coding    | KCNK17 |

|          |           |      |             |         |         |         |                                   |                 |        |
|----------|-----------|------|-------------|---------|---------|---------|-----------------------------------|-----------------|--------|
|          |           |      |             |         |         |         | Noncoding transcript exon variant | Retained intron | KCNK17 |
| 39311754 | T         | C    | rs6907394   | 6.7e-04 | 1.7e-03 | 9.6e-04 | Intron variant                    | Protein coding  | KCNK17 |
|          |           |      |             |         |         |         | Noncoding transcript exon variant | Retained intron | KCNK17 |
| 39311908 | G         | A    | rs6928045   | 6.7e-04 | 1.7e-03 | 9.6e-04 | Intron variant                    | Protein coding  | KCNK17 |
|          |           |      |             |         |         |         | Noncoding transcript exon variant | Retained intron | KCNK17 |
| 39311927 | C         | G    | rs6927737   | 6.7e-04 | 1.7e-03 | 9.6e-04 | Intron variant                    | Protein coding  | KCNK17 |
|          |           |      |             |         |         |         | Noncoding transcript exon variant | Retained intron | KCNK17 |
| 39311946 | CACTGAGCA | C    | rs137963971 | 3.4e-02 | 4.4e-02 | 3.7e-02 | Intron variant                    | Protein coding  | KCNK17 |
|          |           |      |             |         |         |         | Noncoding transcript exon variant | Retained intron | KCNK17 |
| 39312039 | A         | G    | rs6927793   | 6.7e-04 | 1.7e-03 | 9.6e-04 | Intron variant                    | Protein coding  | KCNK17 |
|          |           |      |             |         |         |         | Noncoding transcript exon variant | Retained intron | KCNK17 |
| 39312055 | G         | A    | rs551423178 | 1.3e-03 | 3.4e-03 | 1.9e-03 | Intron variant                    | Protein coding  | KCNK17 |
|          |           |      |             |         |         |         | Noncoding transcript exon variant | Retained intron | KCNK17 |
| 39312227 | G         | T    | rs571188242 | 6.7e-04 | 0       | 4.8e-04 | Intron variant                    | Protein coding  | KCNK17 |
|          |           |      |             |         |         |         | Noncoding transcript exon variant | Retained intron | KCNK17 |
| 39312302 | A         | AAAG | rs144225973 | 6.7e-04 | 1.7e-03 | 9.6e-04 | Intron variant                    | Protein coding  | KCNK17 |

|          |   |   |              |         |         |         |                                   |                 |        |
|----------|---|---|--------------|---------|---------|---------|-----------------------------------|-----------------|--------|
|          |   |   |              |         |         |         | Noncoding transcript exon variant | Retained intron | KCNK17 |
| 39312309 | T | G | rs777636059  | 6.7e-04 | 0       | 4.8e-04 | Intron variant                    | Protein coding  | KCNK17 |
|          |   |   |              |         |         |         | Noncoding transcript exon variant | Retained intron | KCNK17 |
| 39312340 | T | A | rs75113401   | 6.7e-04 | 1.7e-03 | 9.6e-04 | Intron variant                    | Protein coding  | KCNK17 |
|          |   |   |              |         |         |         | Noncoding transcript exon variant | Retained intron | KCNK17 |
| 39312470 | G | A | rs75681028   | 6.7e-04 | 1.7e-03 | 9.6e-04 | Intron variant                    | Protein coding  | KCNK17 |
|          |   |   |              |         |         |         | Noncoding transcript exon variant | Retained intron | KCNK17 |
| 39312596 | G | A | rs1302681257 | 0       | 1.7e-03 | 4.8e-04 | Intron variant                    | Protein coding  | KCNK17 |
|          |   |   |              |         |         |         | Noncoding transcript exon variant | Retained intron | KCNK17 |
| 39312621 | C | T | rs141576163  | 1.4e-02 | 1.9e-02 | 1.5e-02 | Intron variant                    | Protein coding  | KCNK17 |
|          |   |   |              |         |         |         | Noncoding transcript exon variant | Retained intron | KCNK17 |
| 39312658 | A | G | rs9462523    | 6.7e-04 | 1.7e-03 | 9.6e-04 | Intron variant                    | Protein coding  | KCNK17 |
|          |   |   |              |         |         |         | Noncoding transcript exon variant | Retained intron | KCNK17 |
| 39312665 | C | T | rs9471061    | 6.7e-04 | 1.7e-03 | 9.6e-04 | Intron variant                    | Protein coding  | KCNK17 |
|          |   |   |              |         |         |         | Noncoding transcript exon variant | Retained intron | KCNK17 |
| 39312668 | C | G | rs9471062    | 6.7e-04 | 1.7e-03 | 9.6e-04 | Intron variant                    | Protein coding  | KCNK17 |

|          |   |   |             |         |         |         |                                   |                 |        |
|----------|---|---|-------------|---------|---------|---------|-----------------------------------|-----------------|--------|
|          |   |   |             |         |         |         | Noncoding transcript exon variant | Retained intron | KCNK17 |
| 39312673 | G | A | rs187837093 | 4.0e-03 | 6.8e-03 | 4.8e-03 | Intron variant                    | Protein coding  | KCNK17 |
|          |   |   |             |         |         |         | Noncoding transcript exon variant | Retained intron | KCNK17 |
| 39312686 | G | T | rs9462524   | 6.7e-04 | 1.7e-03 | 9.6e-04 | Intron variant                    | Protein coding  | KCNK17 |
|          |   |   |             |         |         |         | Noncoding transcript exon variant | Retained intron | KCNK17 |
| 39312687 | A | G | rs9462525   | 6.7e-04 | 1.7e-03 | 9.6e-04 | Intron variant                    | Protein coding  | KCNK17 |
|          |   |   |             |         |         |         | Noncoding transcript exon variant | Retained intron | KCNK17 |

**PRE on chromosome 9 spanning position 116284900-116285300**

| <b>Variant position</b> | <b>Reference allele</b> | <b>Alternative allele</b> | <b>SNP identifier</b> | <b>MAF in cases</b> | <b>MAF in controls</b> | <b>Cohort MAF</b> | <b>Consequence</b> | <b>Biotype</b> | <b>Gene</b> |
|-------------------------|-------------------------|---------------------------|-----------------------|---------------------|------------------------|-------------------|--------------------|----------------|-------------|
| 116285129               | C                       | CTTTTCT                   | rs201987126           | 2.3e-02             | 2.4e-02                | 2.3e-02           | Intron variant     | Protein coding | PAPPA       |
| 116285142               | C                       | CTTCTT                    | rs753008319           | 3.4e-03             | 5.1e-03                | 3.9e-03           | Intron variant     | Protein coding | PAPPA       |
| 116285159               | T                       | TTTTC                     | rs1268299746          | 6.7e-04             | 0                      | 4.8e-04           | Intron variant     | Protein coding | PAPPA       |
| 116285167               | C                       | T                         | rs370162234           | 6.7e-04             | 0                      | 4.8e-04           | Intron variant     | Protein coding | PAPPA       |
| 116285171               | C                       | CT                        | rs1186068742          | 6.7e-04             | 5.1e-03                | 1.9e-03           | Intron variant     | Protein coding | PAPPA       |
| 116285171               | C                       | CTT                       | rs1186068742          | 2.7e-03             | 0                      | 1.9e-03           | Intron variant     | Protein coding | PAPPA       |
| 116285171               | C                       | CTTT                      | rs1186068742          | 8.7e-03             | 2.4e-02                | 1.3e-02           | Intron variant     | Protein coding | PAPPA       |
| 116285171               | C                       | CTTTT                     | rs1186068742          | 1.1e-02             | 1.2e-02                | 1.1e-02           | Intron variant     | Protein coding | PAPPA       |

|               |         |                                   |              |         |         |         |                           |                   |       |
|---------------|---------|-----------------------------------|--------------|---------|---------|---------|---------------------------|-------------------|-------|
| 11628517<br>1 | C       | CTTTTT                            | rs1186068742 | 1.5e-02 | 2.2e-02 | 1.7e-02 | Intron variant            | Protein coding    | PAPPA |
| 11628517<br>1 | C       | CTTTTTT                           | rs1186068742 | 0       | 3.4e-03 | 9.6e-04 | Intron variant            | Protein coding    | PAPPA |
| 11628517<br>1 | C       | CTTTTTTT                          | rs1186068742 | 4.7e-03 | 5.1e-03 | 4.8e-03 | Intron variant            | Protein coding    | PAPPA |
| 11628517<br>1 | C       | CTTTTTTTTTT<br>TTTT               |              | 6.7e-04 | 0       | 4.8e-04 | Intron variant            | Protein coding    | PAPPA |
| 11628517<br>1 | C       | CTTTTTTTTTT<br>TTTTTTTT           |              | 6.7e-04 | 0       | 4.8e-04 | Intron variant            | Protein coding    | PAPPA |
| 11628517<br>1 | C       | CTTTTTTTTTT<br>TTTTTTTTTTTT<br>TT |              | 0       | 1.7e-03 | 4.8e-04 | Intron variant            | Protein coding    | PAPPA |
| 11628517<br>1 | C       | T                                 | rs373357579  | 0       | 1.7e-03 | 4.8e-04 | Intron variant            | Protein coding    | PAPPA |
| 11628517<br>1 | CT      | C                                 | rs1461822674 | 2.0e-03 | 3.4e-03 | 2.4e-03 | Intron variant            | Protein coding    | PAPPA |
| 11628517<br>1 | CT      | CTT                               | rs1186068742 | 7.4e-03 | 1.5e-02 | 9.6e-03 | Intron variant            | Protein coding    | PAPPA |
| 11628517<br>1 | CT      | CTTTT                             | rs1186068742 | 0       | 3.4e-03 | 9.6e-04 | Intron variant            | Protein coding    | PAPPA |
| 11628517<br>1 | CT      | CTTTTTT                           | rs1186068742 | 8.7e-03 | 0       | 6.3e-03 | Intron variant            | Protein coding    | PAPPA |
| 11628517<br>1 | CT      | CTTTTTTT                          | rs1186068742 | 1.6e-02 | 1.5e-02 | 1.6e-02 | Intron variant            | Protein coding    | PAPPA |
| 11628517<br>1 | CT      | CTTTTTTTTT                        | rs1186068742 | 1.3e-03 | 3.4e-03 | 1.9e-03 | Intron variant            | Protein coding    | PAPPA |
| 11628517<br>6 | T       | C                                 | rs866553011  | 3.4e-03 | 6.8e-03 | 4.3e-03 | Intron variant            | Protein coding    | PAPPA |
| 11628519<br>9 | C       | T                                 | rs752534102  | 6.7e-04 | 0       | 4.8e-04 | Intron variant            | Protein coding    | PAPPA |
| 11628519<br>0 | TGACAGA | T                                 | rs1269494360 | 6.7e-04 | 0       | 4.8e-04 | Intron variant            | Protein coding    | PAPPA |
| 11628520<br>7 | G       | T                                 | rs1379529994 | 6.7e-04 | 0       | 4.8e-04 | Intron variant            | Protein coding    | PAPPA |
|               |         |                                   |              |         |         |         | Regulatory region variant | CTCF binding site |       |
| 11628520<br>0 | TCAC    | T                                 |              | 6.7e-04 | 0       | 4.8e-04 | Intron variant            | Protein coding    | PAPPA |

|                                                          |                  |                    |                |              |                 |            | Regulatory region variant | CTCF binding site |      |
|----------------------------------------------------------|------------------|--------------------|----------------|--------------|-----------------|------------|---------------------------|-------------------|------|
| PRE on chromosome 17 spanning position 79288362-81288362 |                  |                    |                |              |                 |            |                           |                   |      |
| Variant position                                         | Reference allele | Alternative allele | SNP identifier | MAF in cases | MAF in controls | Cohort MAF | Consequence               | Biotype           | Gene |
| 79743000                                                 | G                | A                  | rs151138055    | 1.9e-02      | 1.7e-02         | 1.9e-02    | Intergenic variant        |                   |      |
|                                                          |                  |                    |                |              |                 |            | Regulatory region variant | enhancer          |      |
|                                                          |                  |                    |                |              |                 |            | TFBS variant              |                   |      |
| 79743526                                                 | C                | T                  | rs186983861    | 2.7e-03      | 3.4e-03         | 2.9e-03    | Intergenic variant        |                   |      |
| 79743695                                                 | C                | T                  | rs782085970    | 0            | 3.4e-03         | 9.6e-04    | Intergenic variant        |                   |      |
| 79743782                                                 | G                | A                  | rs1022499002   | 0            | 3.4e-03         | 9.6e-04    | Intergenic variant        |                   |      |
| 79743905                                                 | C                | G                  | rs142093299    | 4.0e-03      | 1.7e-03         | 3.4e-03    | Intergenic variant        |                   |      |
| 79744165                                                 | G                | A                  | rs574355800    | 2.0e-03      | 1.7e-03         | 1.9e-03    | Intergenic variant        |                   |      |
| 79744425                                                 | A                | G                  | rs543023666    | 4.0e-03      | 5.1e-03         | 4.3e-03    | Intergenic variant        |                   |      |
| 79744508                                                 | T                | C                  | rs931838327    | 0            | 3.4e-03         | 9.6e-04    | Intergenic variant        |                   |      |
| 79744530                                                 | T                | C                  | rs7350911      | 2.7e-03      | 0               | 1.9e-03    | Intergenic variant        |                   |      |
| 79744569                                                 | G                | A                  | rs559729244    | 1.3e-03      | 1.7e-03         | 1.4e-03    | Intergenic variant        |                   |      |
| 79744691                                                 | T                | C                  | rs6565482      | 6.7e-04      | 0               | 4.8e-04    | Intergenic variant        |                   |      |
| 79744748                                                 | C                | T                  | rs139975055    | 8.0e-03      | 1.9e-02         | 1.1e-02    | Intergenic variant        |                   |      |
| 79744847                                                 | T                | G                  |                | 6.7e-04      | 1.7e-03         | 9.6e-04    | Intergenic variant        |                   |      |
| 79744911                                                 | T                | C                  | rs1472495903   | 6.7e-04      | 0               | 4.8e-04    | Intergenic variant        |                   |      |



|          |               |            |              |         |         |         |                           |                   |  |
|----------|---------------|------------|--------------|---------|---------|---------|---------------------------|-------------------|--|
| 79744913 | T             | C          |              | 6.7e-04 | 0       | 4.8e-04 | Intergenic variant        |                   |  |
| 79745096 | C             | T          |              | 6.7e-04 | 0       | 4.8e-04 | Intergenic variant        |                   |  |
| 79745214 | G             | A          | rs188506701  | 0       | 1.7e-03 | 4.8e-04 | Intergenic variant        |                   |  |
| 79745401 | C             | T          | rs77272891   | 4.8e-02 | 4.4e-02 | 4.7e-02 | Intergenic variant        |                   |  |
| 79745660 | G             | A          | rs4890023    | 6.7e-04 | 0       | 4.8e-04 | Intergenic variant        |                   |  |
|          |               |            |              |         |         |         | Regulatory region variant | CTCF binding site |  |
| 79745744 | CT            | C          |              | 2.7e-03 | 0       | 1.9e-03 | Intergenic variant        |                   |  |
|          |               |            |              |         |         |         | Regulatory region variant | CTCF binding site |  |
| 79746183 | C             | T          | rs534833318  | 1.3e-02 | 1.0e-02 | 1.3e-02 | Intergenic variant        |                   |  |
|          |               |            |              |         |         |         | Regulatory region variant | CTCF binding site |  |
| 79746195 | T             | TAAAAA     |              | 1.3e-03 | 0       | 9.6e-04 | Intergenic variant        |                   |  |
|          |               |            |              |         |         |         | Regulatory region variant | CTCF binding site |  |
| 79746195 | T             | TAAAAAAAAA |              | 0       | 3.4e-03 | 9.6e-04 | Intergenic variant        |                   |  |
|          |               |            |              |         |         |         | Regulatory region variant | CTCF binding site |  |
| 79746195 | TAAAAAAAAAAAA | T          | rs1374326859 | 3.4e-03 | 1.7e-03 | 2.9e-03 | Intergenic variant        |                   |  |
|          |               |            |              |         |         |         | Regulatory region variant | CTCF binding site |  |
| 79746195 | TAAAAAAAAAAAA | T          | rs1302548755 | 2.3e-02 | 1.2e-02 | 2.0e-02 | Intergenic variant        |                   |  |

|          |                           |   |              |         |         |         |                           |                   |  |
|----------|---------------------------|---|--------------|---------|---------|---------|---------------------------|-------------------|--|
|          |                           |   |              |         |         |         | Regulatory region variant | CTCF binding site |  |
| 79746195 | TAAAAAAAAAAAAA            | T | rs1413301088 | 3.5e-02 | 6.1e-02 | 4.2e-02 | Intergenic variant        |                   |  |
|          |                           |   |              |         |         |         | Regulatory region variant | CTCF binding site |  |
| 79746195 | TAAAAAAAAAAAAA            | T | rs1377694494 | 3.5e-02 | 3.6e-02 | 3.5e-02 | Intergenic variant        |                   |  |
|          |                           |   |              |         |         |         | Regulatory region variant | CTCF binding site |  |
| 79746195 | TAAAAAAAAAAAAA<br>A       | T | rs1174695423 | 1.0e-02 | 6.8e-03 | 9.1e-03 | Intergenic variant        |                   |  |
|          |                           |   |              |         |         |         | Regulatory region variant | CTCF binding site |  |
| 79746195 | TAAAAAAAAAAAAA<br>AAA     | T | rs1362583674 | 7.4e-03 | 1.5e-02 | 9.6e-03 | Intergenic variant        |                   |  |
|          |                           |   |              |         |         |         | Regulatory region variant | CTCF binding site |  |
| 79746195 | TAAAAAAAAAAAAA<br>AAAA    | T | rs1156306872 | 2.0e-03 | 5.1e-03 | 2.9e-03 | Intergenic variant        |                   |  |
|          |                           |   |              |         |         |         | Regulatory region variant | CTCF binding site |  |
| 79746195 | TAAAAAAAAAAAAA<br>AAAAA   | T | rs1420415854 | 2.0e-03 | 5.1e-03 | 2.9e-03 | Intergenic variant        |                   |  |
|          |                           |   |              |         |         |         | Regulatory region variant | CTCF binding site |  |
| 79746195 | TAAAAAAAAAAAAA<br>AAAAAA  | T | rs1250765018 | 6.0e-03 | 8.5e-03 | 6.7e-03 | Intergenic variant        |                   |  |
|          |                           |   |              |         |         |         | Regulatory region variant | CTCF binding site |  |
| 79746195 | TAAAAAAAAAAAAA<br>AAAAAAA | T | rs1186829406 | 2.0e-03 | 0       | 1.4e-03 | Intergenic variant        |                   |  |

|          |                                 |              |              |         |         |         |                           |                   |  |
|----------|---------------------------------|--------------|--------------|---------|---------|---------|---------------------------|-------------------|--|
|          |                                 |              |              |         |         |         | Regulatory region variant | CTCF binding site |  |
| 79746195 | TAAAAAAAAAAAAAAAAA<br>AAAAAAAAA | T            | rs1259292043 | 1.7e-02 | 1.0e-02 | 1.5e-02 | Intergenic variant        |                   |  |
|          |                                 |              |              |         |         |         | Regulatory region variant | CTCF binding site |  |
| 79746195 | TAAAAAAAAAAAAAAAAA<br>AAAAAAAAA | TAAA         | rs1250765018 | 6.7e-04 | 1.7e-03 | 9.6e-04 | Intergenic variant        |                   |  |
|          |                                 |              |              |         |         |         | Regulatory region variant | CTCF binding site |  |
| 79746195 | TAAAAAAAAAAAAAAAAA<br>AAAAAAAAA | TAAAAA       | rs1156306872 | 8.7e-03 | 1.7e-03 | 6.7e-03 | Intergenic variant        |                   |  |
|          |                                 |              |              |         |         |         | Regulatory region variant | CTCF binding site |  |
| 79746195 | TAAAAAAAAAAAAAAAAA<br>AAAAAAAAA | TAAAAAA      | rs1362583674 | 6.0e-03 | 1.7e-03 | 4.8e-03 | Intergenic variant        |                   |  |
|          |                                 |              |              |         |         |         | Regulatory region variant | CTCF binding site |  |
| 79746195 | TAAAAAAAAAAAAAAAAA<br>AAAAAAAAA | TAAAAAA      | rs1419578586 | 6.7e-04 | 0       | 4.8e-04 | Intergenic variant        |                   |  |
|          |                                 |              |              |         |         |         | Regulatory region variant | CTCF binding site |  |
| 79746195 | TAAAAAAAAAAAAAAAAA<br>AAAAAAAAA | TAAAAAA      | rs1174695423 | 1.3e-03 | 8.5e-03 | 3.4e-03 | Intergenic variant        |                   |  |
|          |                                 |              |              |         |         |         | Regulatory region variant | CTCF binding site |  |
| 79746195 | TAAAAAAAAAAAAAAAAA<br>AAAAAAAAA | TAAAAAA      | rs1377694494 | 5.4e-03 | 5.1e-03 | 5.3e-03 | Intergenic variant        |                   |  |
|          |                                 |              |              |         |         |         | Regulatory region variant | CTCF binding site |  |
| 79746195 | TAAAAAAAAAAAAAAAAA<br>AAAAAAAAA | TAAAAAA<br>A | rs1413301088 | 1.9e-02 | 8.5e-03 | 1.6e-02 | Intergenic variant        |                   |  |

|          |                                  |                    |              |         |         |         |                           |                   |  |
|----------|----------------------------------|--------------------|--------------|---------|---------|---------|---------------------------|-------------------|--|
|          |                                  |                    |              |         |         |         | Regulatory region variant | CTCF binding site |  |
| 79746195 | TAAAAAAAAAAAAAAAAA<br>AAAAAAAAAA | TAAAAAAAAAA<br>AA  | rs1302548755 | 3.4e-03 | 0       | 2.4e-03 | Intergenic variant        |                   |  |
|          |                                  |                    |              |         |         |         | Regulatory region variant | CTCF binding site |  |
| 79746195 | TAAAAAAAAAAAAAAAAA<br>AAAAAAAAAA | TAAAAAAAAAA<br>AAA | rs1374326859 | 6.7e-04 | 0       | 4.8e-04 | Intergenic variant        |                   |  |
|          |                                  |                    |              |         |         |         | Regulatory region variant | CTCF binding site |  |
| 79746195 | TAAAAAAAAAAAAAAAAA<br>AAAAAAAAAA | T                  | rs1211346023 | 2.0e-03 | 3.4e-03 | 2.4e-03 | Intergenic variant        |                   |  |
|          |                                  |                    |              |         |         |         | Regulatory region variant | CTCF binding site |  |
| 79746196 | A                                | C                  |              | 6.7e-04 | 0       | 4.8e-04 | Intergenic variant        |                   |  |
|          |                                  |                    |              |         |         |         | Regulatory region variant | CTCF binding site |  |
